# Supplementary material for: A Dual sgRNA Approach for Functional Genomics in Arabidopsis thaliana
Source: Oxford University Press journal article supplement (doi:10.1534/g3.118.200046), 2018-06-08
Supplement: 200046_corrigendum_for_pauwels_et_al.pdf [file 200046_corrigendum_for_pauwels_et_al.pdf]

Corrigendum for Pauwels *et al.*, *G3: Genes/Genomes/Genetics* 8 (8): 2603-2615.

*G3: Genes/Genomes/Genetics*, Vol 8, 2603-2615, August 2018, Copyright © 2018 Pauwels *et al.*

#### CORRIGENDUM

In the article by L. Pauwels, R. De Clercq, J. Goossens, S. Iñigo, C. Williams, M. Ron, A. Britt, and A. Goossens (*G3: Genes/Genomes/Genetics* 8: 2603-2615) entitled “A Dual sgRNA Approach for Functional Genomics in *Arabidopsis thaliana*” on page 2613 in the first sentence of the Acknowledgements section, incomplete funding information was provided related to support from Research Foundation Flanders. The sentence has been corrected as follows:

This work was supported by the Research Foundation Flanders through the projects 1507013N, G005212N, G005312N and G005915N and a postdoctoral fellowship to L.P.; the Belgian Science Policy Organization for a postdoctoral fellowship to S.I. and the Agency for Innovation by Science and Technology in Flanders for a predoctoral fellowship to J.G.; the National Science Foundation for M.R.’s contribution to this work by grant # 1636397.
